# Supplementary material for: Diet Rich in Animal Protein Promotes Pro-inflammatory Macrophage Response and Exacerbates Colitis in Mice
Source: PubMed Central journal article supplement (PMC6497971; doi:10.3389/fimmu.2019.00919), 2019-04-26
Supplement: Data_Sheet_1.pdf [file Data_Sheet_1.pdf]

## *Supplementary Material*

### **1 Supplementary Methods**

#### **1.1. NMR-based metabolomics**

All NMR experiments were performed at 300 K. Standard  $^1\text{H}$  NMR spectra were acquired using Carr-Purcell-Meiboom-Gill (CPMG) pulse sequence with following acquisition parameters: number of scans (NS) = 256, 64k of data points (TD), spectral width (SW) of 20 ppm, relaxation delay (D1) of 4 s. The resonances of water were suppressed by presaturation during relaxation delay. The J-resolved experiment with presaturation (NS=4, SW=16 ppm, TD=8k, number of increments=40, SW=78.125 Hz in the indirect dimension, and relaxation delay=2 s) was performed to facilitate the identification of metabolites. All experiments were measured using standard manufacturer's software Topspin 3.2 (Bruker BioSpin, Rheinstetten, Germany).

The acquired free induction decays (FIDs) were multiplied by an exponential window function (LB = 0.3 Hz). The spectra were automatically phased, baseline corrected and referenced to TSP (0.0 ppm). The spectral baselines were adjusted according to the following two steps: to estimate the baseline within multiple shifted windows of width 200 separation units and to calculate regressions of the varying baseline to the window points using a spline approximation. Univariate statistics using Wilcoxon-Mann-Whitney test was then targeted to all individual signals, which intensities were normalized to the initial pellet weight using Matlab 3.9.14 software. The peak assignment was performed also using Chenomx NMR Suite 7.6, and the HMDB database and published assignments. The metabolite identification was supported by J-resolved and COSY experiments and confirmed using 2D NMR experiments.

## 2 Supplementary Figures and Tables

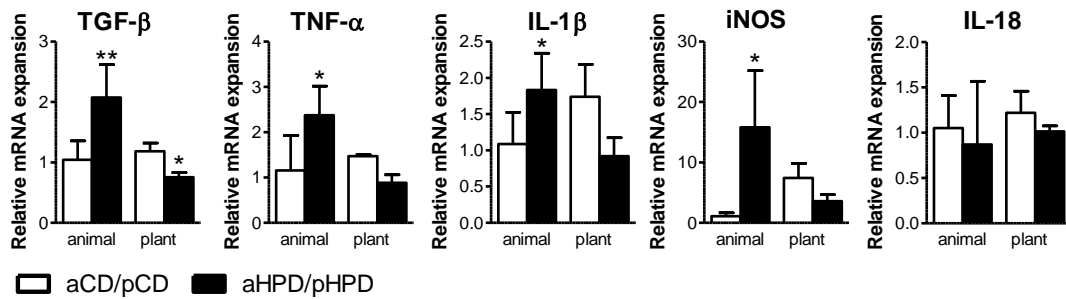

**Supplementary Figure 1.** In colitic mice, animal protein-based HPD increases colonic mRNA expression of TGF- $\beta$ , TNF- $\alpha$ , IL-1 $\beta$ , inducible NO synthase (iNOS), but do not change the IL-18 expression. HPD of plant origin generally decreases their expression. Data are expressed as mean  $\pm$  SD. All parameters were analyzed by unpaired Student's t-test; \* $p < 0.05$  \*\* $p < 0.01$  (n=5-8).

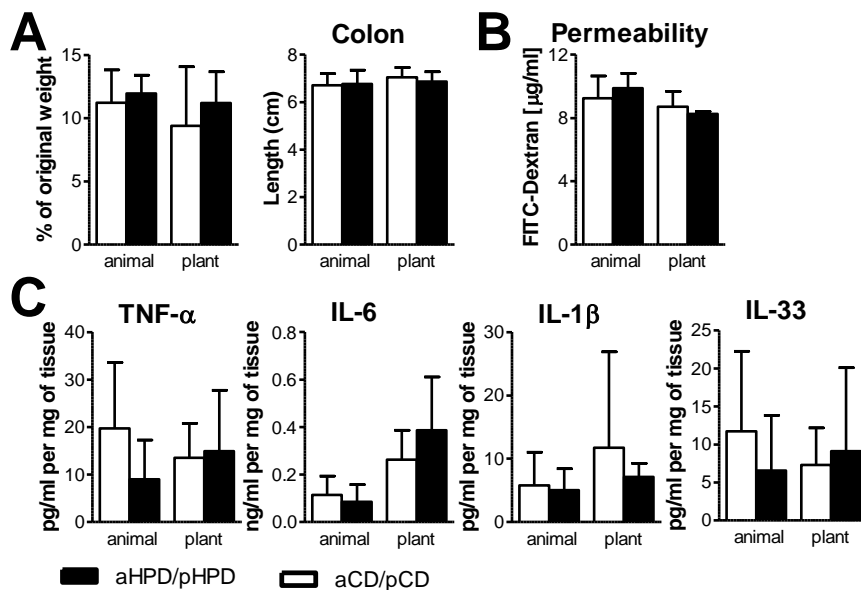

**Supplementary Figure 2.** Healthy BALB/c mice fed diets with different sources of protein do not have any significant differences in weight gain between day -21 and 0 or colon length (A). There were no signs of microscopic mucosa damage (data not shown). Neither HPD diet significantly changed the gut permeability for macromolecules, as analyzed *in vivo* by FITC-dextran method, (B) or production of cytokines by colon tissue, as analyzed by ELISA in tissue culture supernatants (C). Data are expressed as mean  $\pm$  SD. All parameters were analyzed by unpaired Student's t-test (n=4-6).

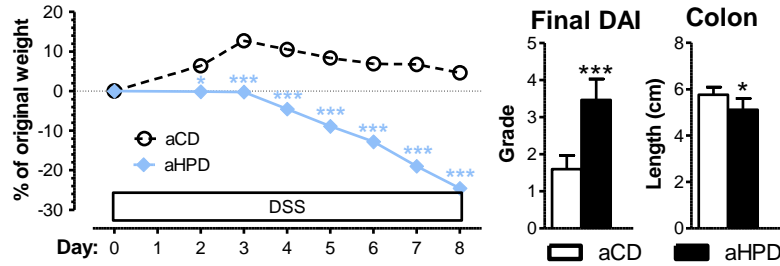

**Supplementary Figure 3.** If mice are exposed to it from birth, HPD of animal origin worsens the severity of acute DSS colitis. Data are expressed as mean (weight change) or mean  $\pm$  SD. The weight loss was analyzed by two-way ANOVA and other parameters by unpaired Student's t-test; \* $p < 0.05$  \*\*\* $p < 0.001$  (n=5).

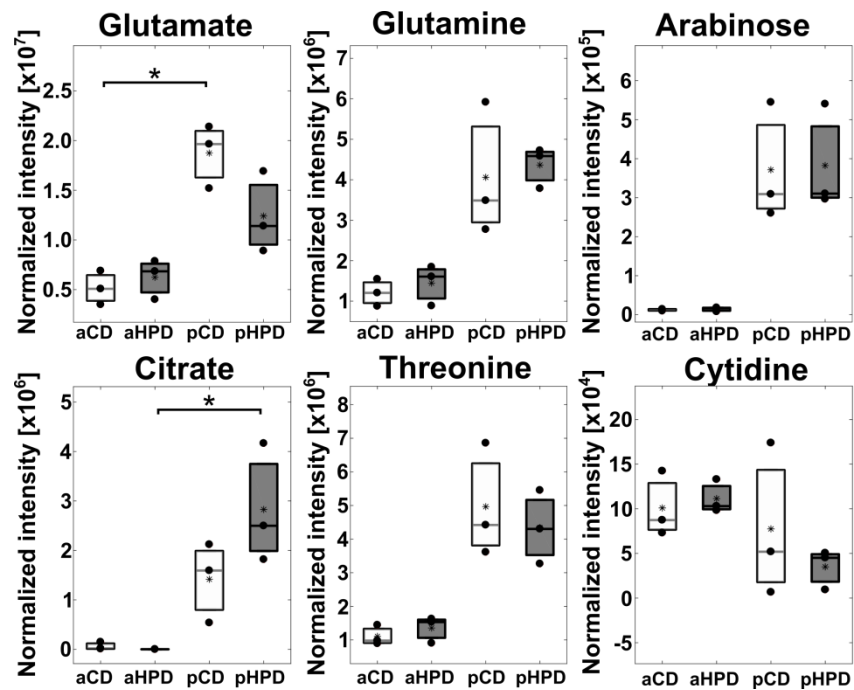

**Supplementary Figure 4.** Animal and plant protein diets produce different metabolites as measured by NMR-based metabolomics approach in fecal content. The biggest shifts were found in glutamate, glutamine, citrate, threonine, arabinose and cytidine. The data were analyzed using Wilcoxon-Mann-Whitney test; \* $p < 0.05$  (n=3). Boxplot legend: asterisk – mean value, black dots – metabolites' intensities in particular samples.

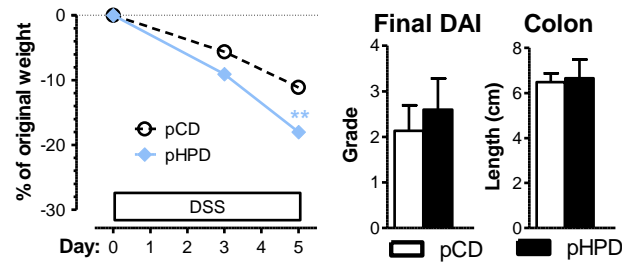

**Supplementary Figure 5.** In immune-deficient  $RAG2^{-/-}$  mice, pHPD does not increase the sensitivity to acute DSS colitis. Data are expressed as mean (weight change) or mean  $\pm$  SD. The weight loss was analyzed by two-way ANOVA and other parameters by unpaired Student's t-test; \*\* $p < 0.01$  ( $n = 5$ ).

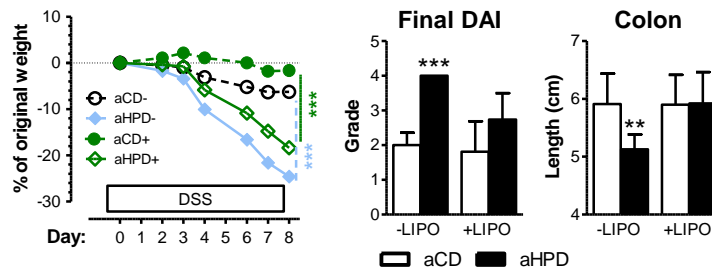

**Supplementary Figure 6.** Clodronate liposomes (+LIPO) prevent aHPD-induced colitis acceleration in BALB/c mice. Data are expressed as mean (weight change) or mean  $\pm$  SD. The weight loss was analyzed by two-way ANOVA and other parameters by unpaired Student's t-test; \*\* $p < 0.01$  \*\*\* $p < 0.001$  ( $n = 5-8$ ).

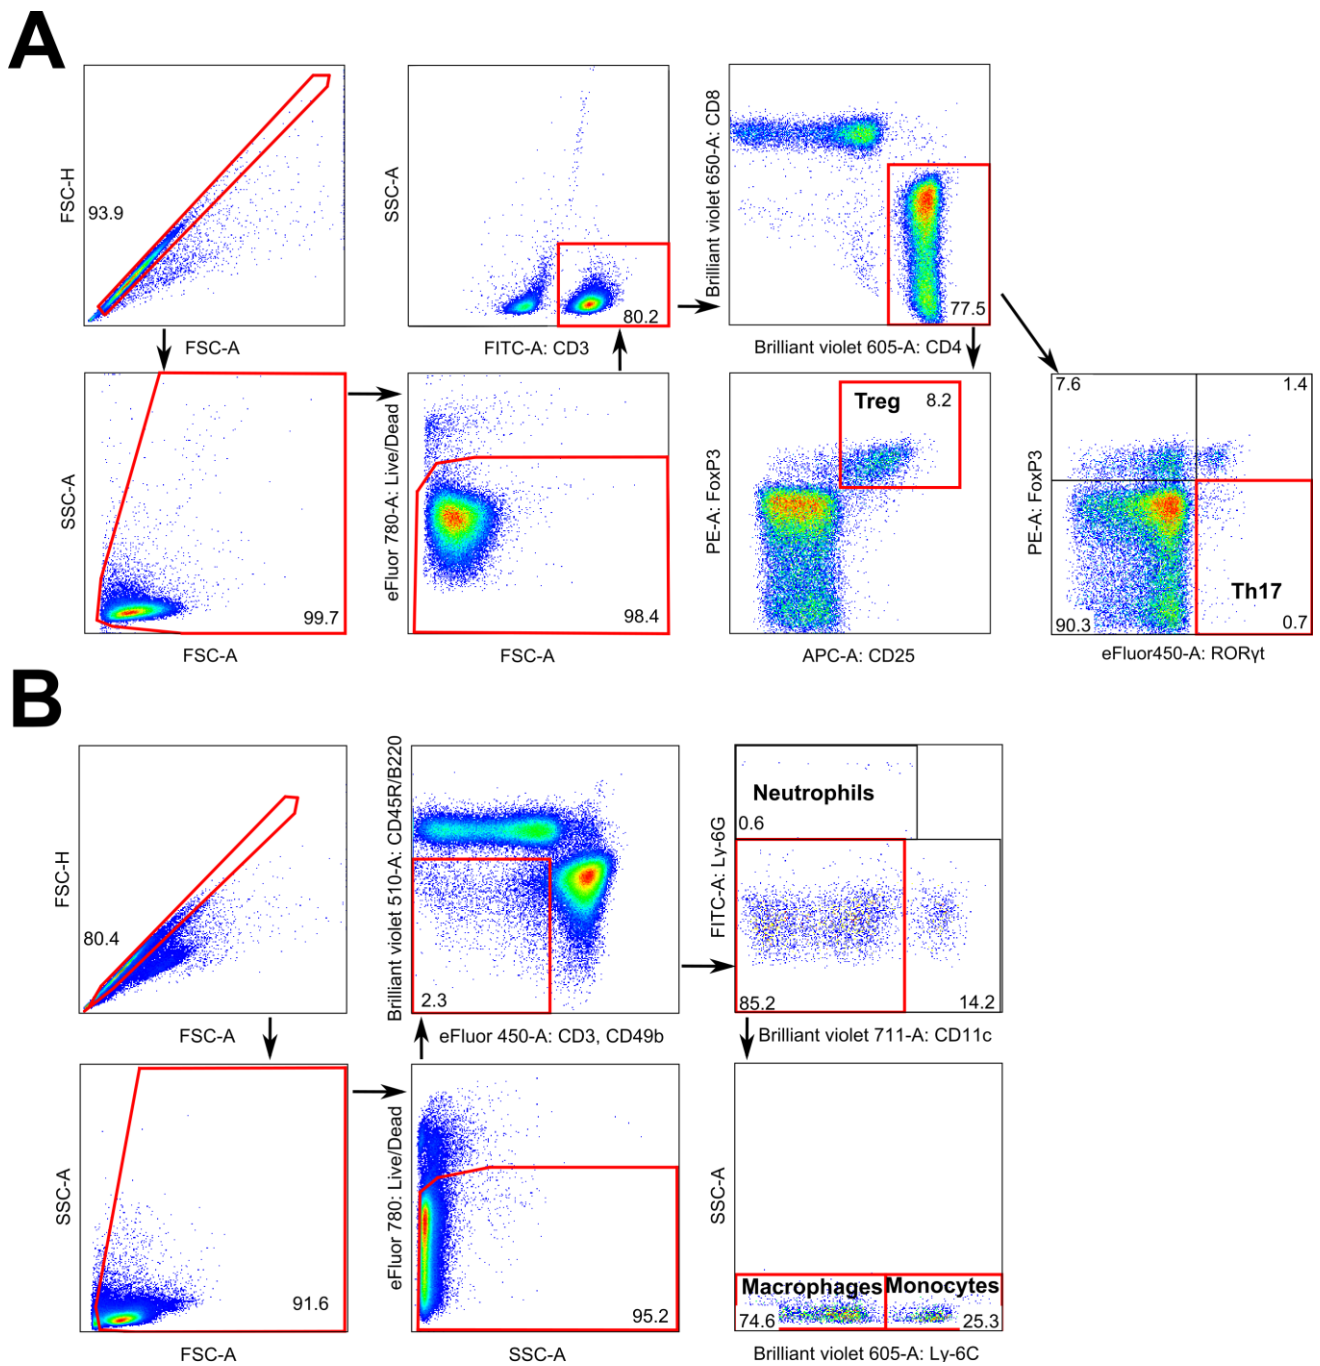

**Supplementary Figure 7.** Gating strategy for Treg and Th17 cells (A), monocytes, macrophages and neutrophils (B) using mesenteric lymph nodes (mLN) of colitic BALB/c mouse.

## 2.1 Supplementary Tables

**Supplementary Table 1.** Fluorochrome-labeled antibodies used for flow cytometry.

| Epitope – Fluorochrome            | Clone    | Manufacturer             | Cat#       | RRID        |
|-----------------------------------|----------|--------------------------|------------|-------------|
| Fixable Viability Dye eFluor 780  | -        | Thermo Fisher Scientific | 65-0865-14 | -           |
| CD3 – FITC                        | 145-2C11 | BioLegend                | 100306     | AB_312671   |
| CD4 – Brilliant violet 605        | GK1.5    | BioLegend                | 100451     | AB_2564591  |
| CD8 – Brilliant violet 650        | 53-6.7   | BioLegend                | 100741     | AB_11124344 |
| CD25 – APC                        | PC61.5   | Thermo Fisher Scientific | 17-0251-82 | AB_469366   |
| Foxp3 – PE                        | FJK-16s  | Thermo Fisher Scientific | 12-5773-82 | AB_465936   |
| Roryt – Brilliant violet 421      | Q31-378  | BD Biosciences           | 562894     | AB_2687545  |
| CD3 – eFluor 450                  | 17A2     | Thermo Fisher Scientific | 48-0032-82 | AB_1272193  |
| CD49b – eFluor 450                | DX5      | Thermo Fisher Scientific | 48-5971-82 | AB_10671541 |
| CD45R/B220 – Brilliant violet 510 | RA3-6B2  | BioLegend                | 103247     | AB_2561394  |
| Ly6G – FITC                       | 1A8      | BioLegend                | 127606     | AB_1236494  |
| Ly6C – Brilliant violet 605       | HK1.4    | BioLegend                | 128036     | AB_2562353  |
| CD11c – Brilliant violet 711      | N418     | BioLegend                | 117349     | AB_2563905  |

**Supplementary Table 2.** PCR primers used for gene expression analysis by quantitative RT-PCR.

| Gene         | Forward                  | Reverse                  |
|--------------|--------------------------|--------------------------|
| <i>Rps12</i> | CCTCGATGACATCCTTGGCCTGAG | GGAAGGCATAGCTGCTGGAGGTGT |
| <i>Tgfb1</i> | TTGCTTCAGCTCCACAGAGA     | TGGTTGTAGAGGGCAAGGAC     |
| <i>Tnfa</i>  | TCTCTTCAAGGGACAAGGCT     | CGGACTCCGCAAAGTCTAAG     |
| <i>Il1b</i>  | CTTCAGGCAGGCAGTATCAC     | TCCATTGAGGTGGAGAGCTT     |
| <i>Inos</i>  | TCAGCCAAGCCCTCACCTAC     | CCAATCTCTGCCTATCCGTCTC   |
| <i>Il18</i>  | ACGTGTTCCAGGACACAACA     | ACAAACCCTCCCCACCTAAC     |
